# Supplementary material
Source: publisher figshare collection journal article supplement (https://acs.figshare.com/ndownloader/files/12750155)
Supplement: Supplementary file 1 [file 12750155]

## *Supporting Information*

# **Designed Construction of Cluster Organic Frameworks From Lindqvist-Type Polyoxovanadate Clusters**

Xin-Xiong Li,<sup>\*,†‡</sup> Lin-Jie Zhang,<sup>‡</sup> Cai-Yan Cui,<sup>‡</sup> Rui-Hu Wang<sup>\*,‡</sup> and Guo-Yu Yang<sup>\*,§</sup>

<sup>†</sup> State Key Laboratory of Photocatalysis on Energy and Environment, College of Chemistry, Fuzhou University, Fuzhou, Fujian, 350108, China.

<sup>‡</sup> State Key Laboratory of Structural Chemistry Fujian Institute of Research on the Structure of Matter, Chinese Academy of Sciences, Fuzhou, Fujian, 350002, China.

<sup>§</sup> MOE Key Laboratory of Cluster Science, School of Chemistry, Beijing Institute of Technology, Beijing 100081, China  
Chemistry and Chemical Engineering, Beijing Institute of Technology, Beijing 100081, China.

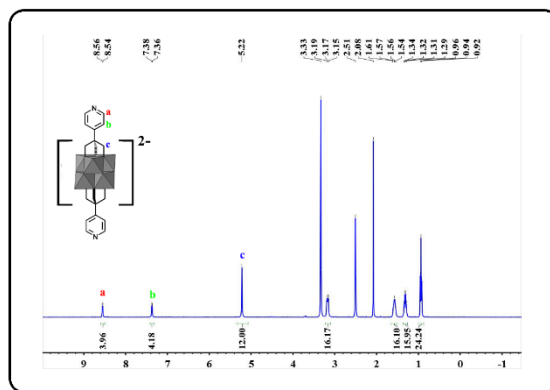

**Figure S1** The  $^1\text{H}$  NMR spectrum of **1**.

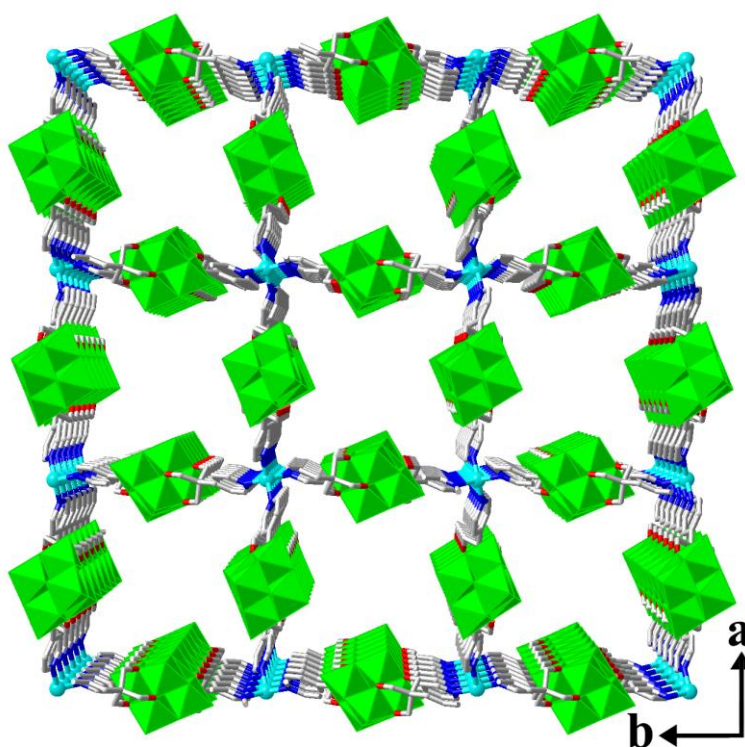

**Figure S2** View of the 3-D anionic framework based on four-connected Cu<sup>+</sup> ions and  $[\text{V}_6\text{O}_{13}(\text{L})_2]^{2-}$  anions along the *c* axis.

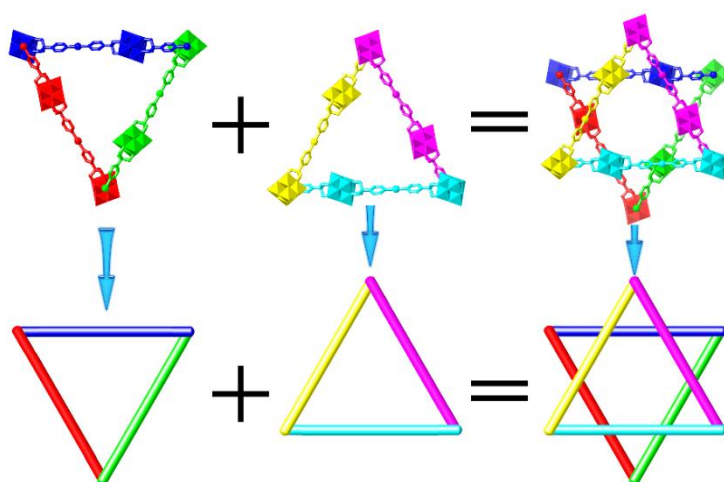

**Figure S3** Schematic presentation of the packing arrangement for the 1-D coordination chains in **3**.

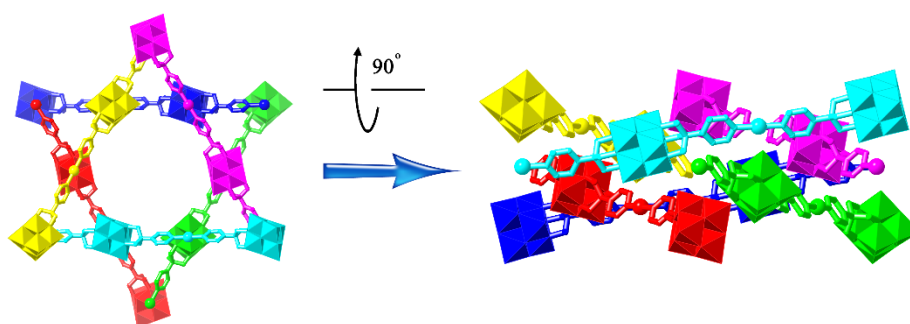

**Figure S4** Side view of the stacking of 1-D chains in **3**.

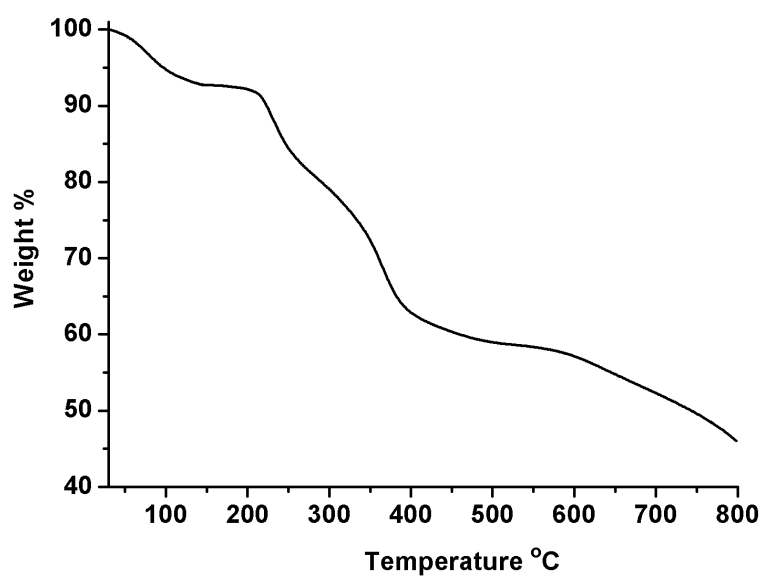

**Figure S5** TGA curve of **2**.

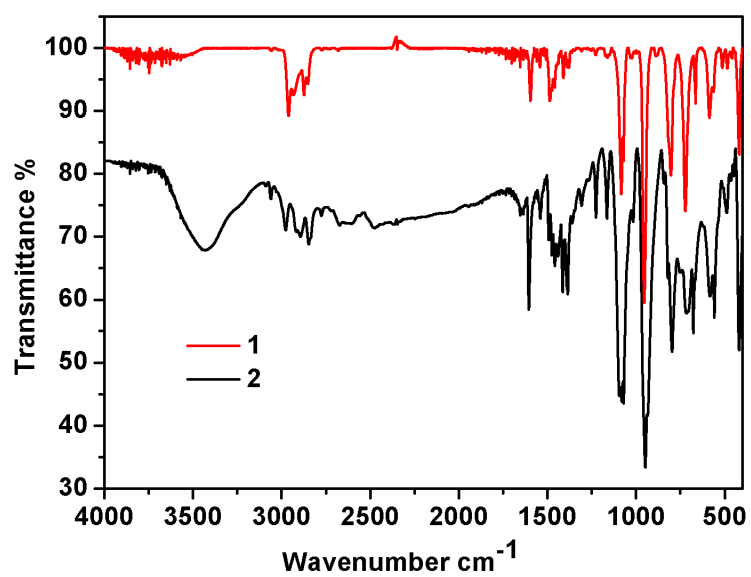

**Figure S6** IR spectra of **1** and **2**.

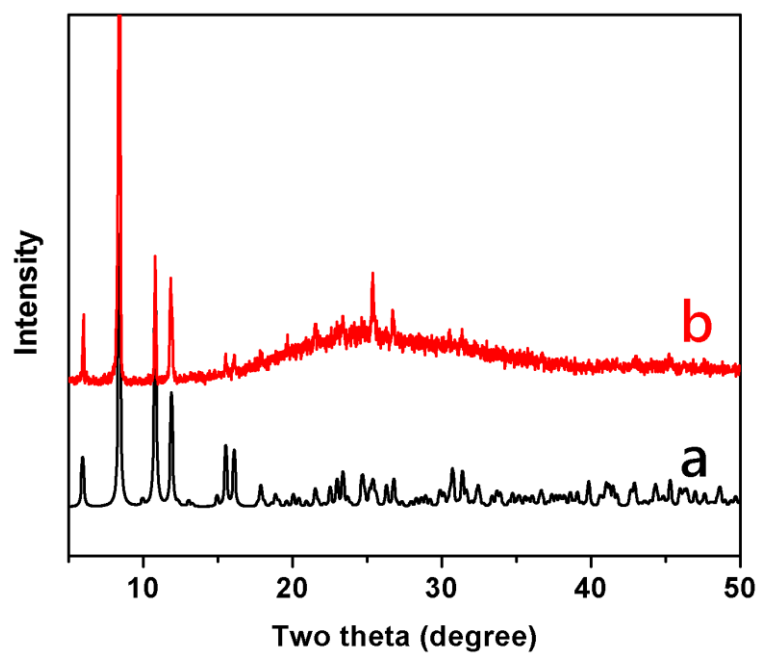

**Figure S7** The PXRD patterns for (a) simulated **2** and as-prepared sample immersed in 0.2 M pH = 7 phosphate buffer for 12 hours (b).
